# Supplementary material
Source: PubMed Central journal article supplement (PMC3547248)
Supplement: mmc1.pdf [file mmc1.pdf]

# THE LANCET

## **Supplementary appendix**

This appendix formed part of the original submission and has been peer reviewed. We post it as supplied by the authors.

Supplement to: Pirie K, Peto R, Reeves GK, Green J, Beral V, for the Million Women Study Collaborators. The 21st century hazards of smoking and benefits of stopping: a prospective study of one million women in the UK. *Lancet* 2012; published online Oct 27. [http://dx.doi.org/10.1016/S0140-6736\(12\)61720-6](http://dx.doi.org/10.1016/S0140-6736(12)61720-6).

## Page

- 2 **Webappendix contents (Click on any item to jump directly to it)**
- 3 **Characteristics of study participants at recruitment, by smoking status reported at recruitment**
- 4 **Characteristics of study participants, by age at stopping smoking reported at the 3-year postal resurvey**
- 5 **All-cause mortality: 12-year relative risk for current and ex-smokers versus never-smokers, showing the effect of adjustment for additional variables**
- 6 **Cancer of the lung: 9-year relative risk for current smokers versus never-smokers, by the age at which women first began smoking regularly (as reported at the 3-year postal resurvey)**
- 7 **Thirty most common specific causes of death: 12-year relative risk for current smokers versus never-smokers, excluding the first three years of follow-up**
- 8 **All-cause mortality and the thirty most common specific causes of death: 12-year relative risk for current smokers by amount smoked versus never-smokers**
- 9 **All-cause mortality and the four main causes of death among current smokers: Death rates per 100,000 women and 12-year relative risk for current smokers versus never-smokers by attained age**
- 10 **Chronic lung disease, cancer of the lung, coronary heart disease, and cerebrovascular disease: 9-year relative risk for ex-smokers by age at stopping (as reported at the 3-year postal resurvey) versus never-smokers**
- 11 **References**

**Webtable 1: Characteristics of study participants at recruitment, by smoking status reported at recruitment\***

NA: not applicable. Entries are % [number] of women, or mean (SD)

|                                                                   | Never smoker<br>at recruitment<br>n=619,774 | Ex-smoker<br>at recruitment<br>n=328,417 | Current smoker at recruitment, by cigarettes smoked per day |                         |                         |                          |
|-------------------------------------------------------------------|---------------------------------------------|------------------------------------------|-------------------------------------------------------------|-------------------------|-------------------------|--------------------------|
|                                                                   |                                             |                                          | <10<br>n=58,957                                             | 10-19<br>n=116,122      | ≥20<br>n=57,382         | All amounts<br>n=232,461 |
| <b>Characteristics at recruitment:</b>                            |                                             |                                          |                                                             |                         |                         |                          |
| Age, years                                                        | 56.2 (4.7)                                  | 56.0 (4.6)                               | 55.6 (4.5)                                                  | 55.3 (4.3)              | 54.7 (4.1)              | 55.2 (4.3)               |
| Lowest socio-economic quintile (%)                                | 14.7 [90,358]                               | 18.2 [59,338]                            | 24.6 [14,410]                                               | 31.9 [36,854]           | 35.6 [20,273]           | 31.0 [71,537]            |
| Number of children                                                | 2.1 (1.2)                                   | 2.1 (1.2)                                | 2.1 (1.3)                                                   | 2.3 (1.3)               | 2.3 (1.4)               | 2.2 (1.3)                |
| Ever used oral contraceptives (%)                                 | 56.1 [345,036]                              | 64.5 [209,931]                           | 63.6 [36,920]                                               | 64.4 [73,613]           | 67.5 [38,233]           | 65.0 [148,766]           |
| Ever used menopausal hormone therapy (%)                          | 46.9 [287,889]                              | 55.1 [179,025]                           | 52.9 [30,692]                                               | 53.6 [61,336]           | 57.8 [32,706]           | 54.5 [124,734]           |
| Body mass index, kg/m <sup>2</sup>                                | 26.1 (4.6)                                  | 26.6 (4.7)                               | 25.2 (4.2)                                                  | 25.3 (4.3)              | 26.1 (4.8)              | 25.5 (4.4)               |
| Any strenuous exercise (%)                                        | 55.7 [335,063]                              | 54.5 [173,680]                           | 49.2 [27,460]                                               | 40.1 [43,878]           | 34.6 [18,855]           | 41.0 [90,193]            |
| More than 14 units of alcohol per week (%)                        | 3.3 [20,305]                                | 7.6 [24,811]                             | 5.5 [3,201]                                                 | 5.2 [5,963]             | 10.9 [6,174]            | 6.7 [15,338]             |
| Currently treated for depression (%)                              | 6.7 [41,366]                                | 8.1 [26,646]                             | 10.2 [6,030]                                                | 11.9 [13,817]           | 17.0 [9,764]            | 12.8 [29,611]            |
| <b>Follow-up from recruitment:</b>                                |                                             |                                          |                                                             |                         |                         |                          |
| Woman-years                                                       | 11.9 (1.6)                                  | 11.8 (1.7)                               | 11.7 (1.9)                                                  | 11.5 (2.1)              | 11.3 (2.3)              | 11.5 (2.1)               |
| Number of deaths                                                  | 25,030                                      | 16,858                                   | 4,513                                                       | 12,282                  | 7,806                   | 24,601                   |
| <b>Percentage of current smokers when resurveyed:</b>             |                                             |                                          |                                                             |                         |                         |                          |
| 3.3 years after recruitment                                       | <0.1<br>[223/424,277]                       | 2.2<br>[4,756/217,248]                   | 65.2<br>[19,417/29,773]                                     | 79.4<br>[44,401/55,953] | 83.6<br>[23,229/27,795] | 76.7<br>[87,047/113,521] |
| 7.8 years after recruitment                                       | <0.1<br>[124/343,647]                       | 1.7<br>[3,017/174,709]                   | 42.5<br>[9,926/23,370]                                      | 59.2<br>[24,454/41,320] | 66.3<br>[13,636/20,566] | 56.3<br>[48,016/85,256]  |
| <b>Measurements in a random sample 9 years after recruitment:</b> |                                             |                                          |                                                             |                         |                         |                          |
| Total cholesterol, mmol/L ‡                                       | 5.74 (1.11)                                 | 5.72 (1.12)                              | 5.75 (1.11)                                                 | 5.77 (1.19)             | 5.60 (1.10)             | 5.72 (1.13)              |
| HDL cholesterol, mmol/L ‡                                         | 1.59 (0.40)                                 | 1.59 (0.41)                              | 1.58 (0.39)                                                 | 1.47 (0.40)             | 1.43 (0.42)             | 1.59 (0.41)              |
| Apolipoprotein A1, g/L ‡                                          | 1.68 (0.27)                                 | 1.70 (0.27)                              | 1.69 (0.27)                                                 | 1.63 (0.27)             | 1.61 (0.30)             | 1.65 (0.28)              |
| Apolipoprotein B, g/L ‡                                           | 1.06 (0.25)                                 | 1.06 (0.25)                              | 1.07 (0.23)                                                 | 1.10 (0.27)             | 1.09 (0.26)             | 1.09 (0.25)              |
| Systolic blood pressure, mmHg †                                   | 134.6 (16.2)                                | 135.1 (16.8)                             | 129.9 (14.8)                                                | 134.1 (18.2)            | 133.5 (17.0)            | 132.6 (17.0)             |
| Diastolic blood pressure, mmHg †                                  | 78.1 (9.3)                                  | 78.3 (9.9)                               | 75.5 (8.6)                                                  | 78.6 (9.9)              | 80.4 (11.0)             | 78.0 (9.9)               |
| Body mass index, kg/m <sup>2</sup> ‡                              | 26.4 (4.5)                                  | 27.5 (5.0)                               | 26.1 (3.9)                                                  | 26.6 (4.4)              | 27.7 (5.4)              | 26.7 (4.5)               |

\* Numbers do not always sum to totals due to missing values

‡ 9256 samples collected in 2006, 2007 & 2009; mean 9.0 (SD 1.4) years after recruitment

† 3656 women measured in 2007 & 2009; mean 9.4 (SD 1.4) years after recruitment

**Web table 2: Characteristics of study participants, by age at stopping smoking reported at the 3-year postal resurvey\***

NA: not applicable. Entries are % [number] of women, or mean (SD)

|                                                                   | Never smoker at the 3 year resurvey<br>n=395,400 | Current smoker at the 3 year resurvey<br>n=84,735 | Ex-smoker at recruitment and the 3 year resurvey, by age at stopping smoking (years) |                                |                                |                                |                                    |
|-------------------------------------------------------------------|--------------------------------------------------|---------------------------------------------------|--------------------------------------------------------------------------------------|--------------------------------|--------------------------------|--------------------------------|------------------------------------|
|                                                                   |                                                  |                                                   | <25<br>(mean 22)<br>n=21,372                                                         | 25-34<br>(mean 29)<br>n=59,208 | 35-44<br>(mean 39)<br>n=55,086 | 45-54<br>(mean 49)<br>n=43,255 | All ages<br>(mean 36)<br>n=178,921 |
| <b>Characteristics at recruitment:</b>                            |                                                  |                                                   |                                                                                      |                                |                                |                                |                                    |
| Age, years                                                        | 56.2 (4.7)                                       | 55.1 (4.3)                                        | 54.0 (4.0)                                                                           | 55.0 (4.3)                     | 55.9 (4.5)                     | 57.0 (4.4)                     | 55.7 (4.4)                         |
| Lowest socio-economic quintile (%)                                | 16.9 [66,131]                                    | 34.0 [28,649]                                     | 16.2 [3,438]                                                                         | 17.3 [10,149]                  | 21.2 [11,616]                  | 24.7 [10,618]                  | 20.2 [35,821]                      |
| Number of children                                                | 2.1 (1.2)                                        | 2.2 (1.3)                                         | 2.1 (1.1)                                                                            | 2.0 (1.1)                      | 2.0 (1.2)                      | 2.1 (1.2)                      | 2.0 (1.2)                          |
| Ever used oral contraceptives (%)                                 | 57.1 [224,237]                                   | 67.8 [56,916]                                     | 70.5 [14,992]                                                                        | 69.1 [40,688]                  | 66.5 [36,433]                  | 63.5 [27,244]                  | 67.1 [119,357]                     |
| Ever used menopausal hormone therapy (%)                          | 47.4 [185,822]                                   | 56.1 [47,045]                                     | 52.4 [11,105]                                                                        | 54.5 [32,025]                  | 58.0 [31,651]                  | 59.1 [25,308]                  | 56.4 [100,089]                     |
| Body mass index, kg/m <sup>2</sup>                                | 25.9 (4.5)                                       | 25.3 (4.3)                                        | 25.9 (4.6)                                                                           | 26.0 (4.5)                     | 26.6 (4.7)                     | 27.0 (4.7)                     | 26.4 (4.7)                         |
| Any strenuous exercise (%)                                        | 58.8 [227,131]                                   | 44.3 [36,069]                                     | 63.6 [13,342]                                                                        | 61.8 [35,929]                  | 57.9 [31,250]                  | 53.1 [22,399]                  | 58.7 [102,920]                     |
| More than 14 units of alcohol per week (%)                        | 3.3 [12,912]                                     | 7.9 [6,620]                                       | 6.4 [1,365]                                                                          | 8.2 [4,840]                    | 9.1 [4,992]                    | 8.6 [3,683]                    | 8.2 [16,307]                       |
| Currently treated for depression (%)                              | 6.1 [24,084]                                     | 11.9 [10,061]                                     | 6.4 [1,358]                                                                          | 6.5 [3,838]                    | 7.3 [4,039]                    | 8.7 [3,761]                    | 7.3 [12,996]                       |
| <b>Follow-up from the 3 year resurvey:</b>                        |                                                  |                                                   |                                                                                      |                                |                                |                                |                                    |
| Woman-years                                                       | 8.8 (1.6)                                        | 8.5 (1.9)                                         | 8.7 (1.6)                                                                            | 8.7 (1.6)                      | 8.7 (1.7)                      | 8.6 (1.8)                      | 8.7 (1.7)                          |
| Number of deaths                                                  | 11,594                                           | 6,759                                             | 481                                                                                  | 1,523                          | 1,814                          | 2,095                          | 5,913                              |
| <b>Measurements in a random sample 9 years after recruitment:</b> |                                                  |                                                   |                                                                                      |                                |                                |                                |                                    |
| Total cholesterol, mmol/L ‡                                       | 5.74 (1.11)                                      | 5.72 (1.14)                                       | 5.71 (1.09)                                                                          | 5.80 (1.10)                    | 5.65 (1.10)                    | 5.72 (1.14)                    | 5.73 (1.11)                        |
| HDL cholesterol, mmol/L ‡                                         | 1.59 (0.40)                                      | 1.48 (0.39)                                       | 1.59 (0.38)                                                                          | 1.64 (0.42)                    | 1.60 (0.41)                    | 1.55 (0.38)                    | 1.60 (0.41)                        |
| Apolipoprotein A1, g/L ‡                                          | 1.68 (0.27)                                      | 1.64 (0.27)                                       | 1.68 (0.25)                                                                          | 1.72 (0.28)                    | 1.70 (0.26)                    | 1.67 (0.27)                    | 1.70 (0.27)                        |
| Apolipoprotein B, g/L ‡                                           | 1.06 (0.25)                                      | 1.09 (0.26)                                       | 1.05 (0.24)                                                                          | 1.06 (0.25)                    | 1.05 (0.25)                    | 1.07 (0.25)                    | 1.06 (0.25)                        |
| Systolic blood pressure, mmHg ‡                                   | 134.8 (16.5)                                     | 133.9 (16.7)                                      | 132.2 (16.7)                                                                         | 134.2 (17.5)                   | 135.8 (17.0)                   | 135.3 (15.5)                   | 134.7 (16.9)                       |
| Diastolic blood pressure, mmHg ‡                                  | 78.1 (9.4)                                       | 78.7 (10.0)                                       | 77.7 (10.0)                                                                          | 78.3 (9.4)                     | 79.0 (9.9)                     | 77.1 (10.5)                    | 78.2 (9.8)                         |
| Body mass index, kg/m <sup>2</sup>                                | 26.4 (4.5)                                       | 26.4 (4.5)                                        | 26.0 (3.9)                                                                           | 27.2 (5.2)                     | 27.5 (5.0)                     | 28.4 (5.7)                     | 27.4 (5.1)                         |

\* Women who completed the first two study questionnaires and reported the same smoking status (never, ex, current) on each. Numbers do not always sum to totals due to missing values

‡ 7529 samples collected in 2006, 2007 & 2009; mean 5.7 (SD 1.7) years after the 3-year resurvey

‡ 1503 women measured in 2007 & 2009; mean 6.0 (SD 1.8) years after the 3-year resurvey

**Web table 3: All-cause mortality: 12-year relative risk (95% confidence interval) for current and ex-smokers versus never-smokers, showing the effect of adjustment for additional variables\***

|                                                    | Number of deaths | Adjusted for:       |                                    |                  |                   |                     |                                                  |
|----------------------------------------------------|------------------|---------------------|------------------------------------|------------------|-------------------|---------------------|--------------------------------------------------|
|                                                    |                  | age and region only | + quintile of socioeconomic status | + alcohol        | + body mass index | + physical activity | + OC use, height, menopausal status, and HRT use |
| <b>Smoking status reported at baseline:</b>        |                  |                     |                                    |                  |                   |                     |                                                  |
| Never smoked                                       | 25,030           | 1.00 (reference)    | 1.00 (reference)                   | 1.00 (reference) | 1.00 (reference)  | 1.00 (reference)    | 1.00 (reference)                                 |
| Current smoker                                     | 24,601           | 3.06 (3.01-3.12)    | 2.90 (2.84-2.95)                   | 2.84 (2.78-2.89) | 2.83 (2.78-2.89)  | 2.76 (2.71-2.81)    | 2.76 (2.71-2.81)                                 |
| <10 cigarettes/day                                 | 4,513            | 2.08 (2.01-2.14)    | 2.01 (1.95-2.07)                   | 2.00 (1.94-2.06) | 2.00 (1.94-2.07)  | 1.97 (1.91-2.04)    | 1.98 (1.91-2.04)                                 |
| 10-19 cigarettes/day                               | 12,282           | 3.06 (3.00-3.13)    | 2.90 (2.84-2.97)                   | 2.85 (2.79-2.91) | 2.85 (2.78-2.91)  | 2.77 (2.71-2.83)    | 2.77 (2.71-2.83)                                 |
| 20+ cigarettes/day                                 | 7,806            | 4.29 (4.18-4.40)    | 4.03 (3.92-4.14)                   | 3.91 (3.80-4.01) | 3.86 (3.76-3.96)  | 3.73 (3.63-3.83)    | 3.74 (3.64-3.85)                                 |
| <b>Smoking status reported at 3-year resurvey:</b> |                  |                     |                                    |                  |                   |                     |                                                  |
| Never smoked                                       | 11,594           | 1.00 (reference)    | 1.00 (reference)                   | 1.00 (reference) | 1.00 (reference)  | 1.00 (reference)    | 1.00 (reference)                                 |
| Ex-smoker, stopped aged <25 years                  | 481              | 0.98 (0.89-1.07)    | 0.98 (0.89-1.07)                   | 1.00 (0.92-1.10) | 1.00 (0.91-1.10)  | 1.01 (0.92-1.11)    | 1.01 (0.92-1.11)                                 |
| Ex-smoker, stopped aged 25-34 years                | 1,523            | 1.02 (0.96-1.07)    | 1.02 (0.96-1.07)                   | 1.05 (0.99-1.11) | 1.04 (0.99-1.10)  | 1.05 (1.00-1.11)    | 1.05 (1.00-1.11)                                 |
| Ex-smoker, stopped aged 35-44 years                | 1,814            | 1.18 (1.12-1.24)    | 1.17 (1.11-1.23)                   | 1.20 (1.14-1.26) | 1.19 (1.13-1.25)  | 1.19 (1.13-1.25)    | 1.20 (1.14-1.26)                                 |
| Ex-smoker, stopped aged 45-54 years                | 2,095            | 1.58 (1.51-1.66)    | 1.54 (1.47-1.62)                   | 1.57 (1.50-1.65) | 1.55 (1.48-1.63)  | 1.55 (1.48-1.62)    | 1.56 (1.49-1.64)                                 |

\* HRT: Hormone therapy for the menopause; OC: oral contraceptives.

**Web figure 1. Cancer of the lung: 9-year relative risk for current smokers versus never-smokers, by the age at which women first began smoking regularly (as reported at the 3-year postal resurvey)**

For each category, the area of the square is inversely proportional to the variance of the category-specific log risk (which also determines the CI)

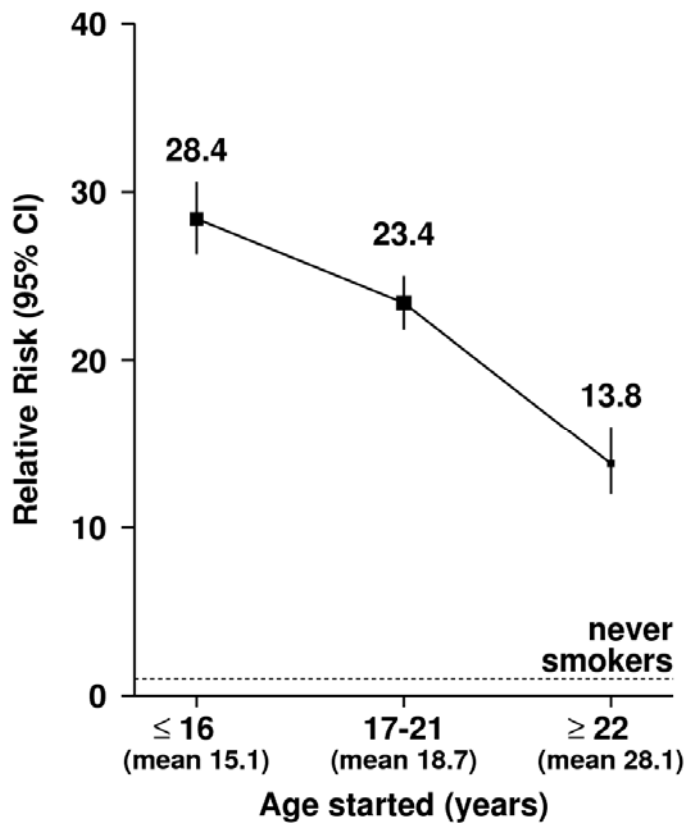

**Web figure 2. Thirty most common specific causes of death: 12-year relative risk for current smokers versus never-smokers, excluding the first three years of follow-up**

The area of each square is inversely proportional to the variance of the log relative risk (vs never-smokers), which also determines the CI

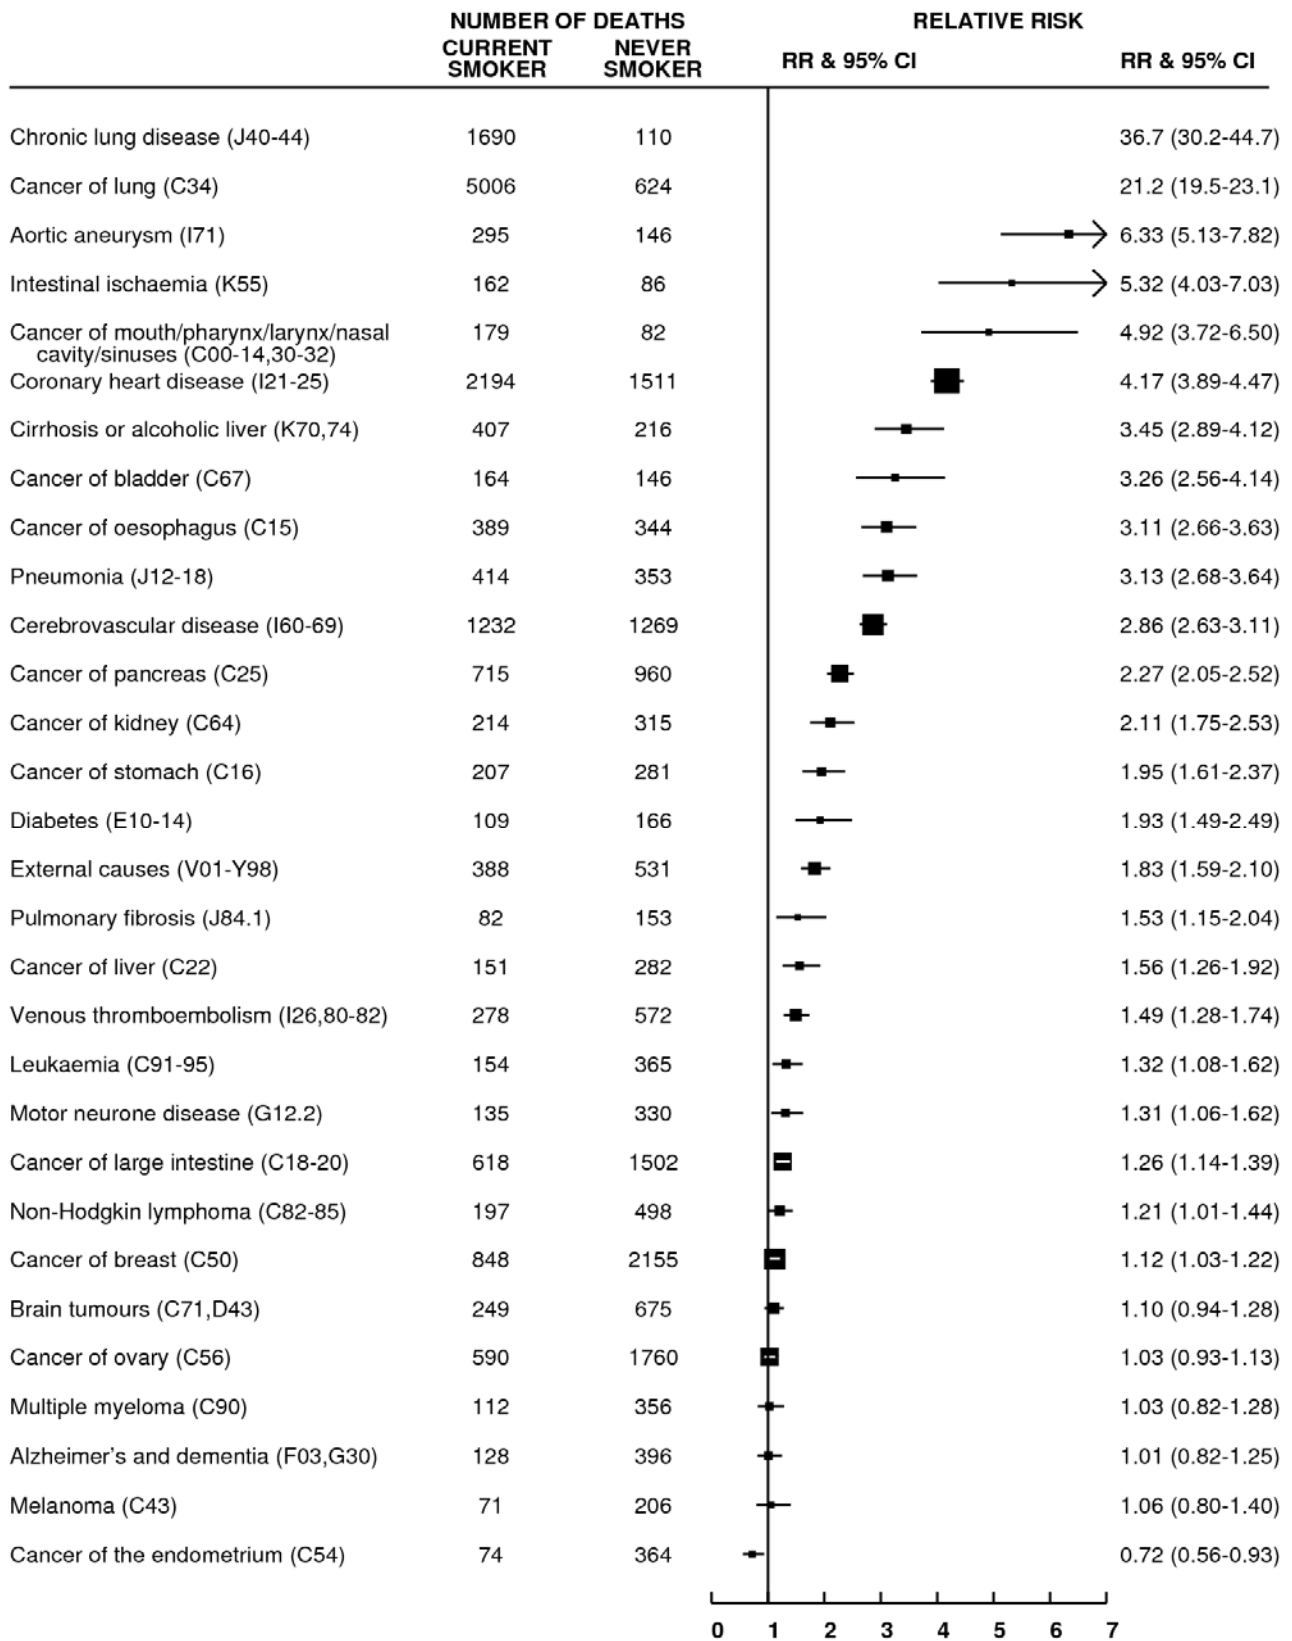

**Web table 4: All-cause mortality and the thirty most common specific causes of death: 12-year relative risk (RR) for current smokers by amount smoked versus never-smokers**  
 For each category, the SE(log risk) is for the category-specific log risk, allowing valid comparisons to be made between any two categories<sup>1</sup>

|                                                                          | Never smoker at recruitment |     |               | Current smoker at recruitment, by cigarettes smoked per day |       |               |        |       |               |        |       |               | p (trend) among current smokers |
|--------------------------------------------------------------------------|-----------------------------|-----|---------------|-------------------------------------------------------------|-------|---------------|--------|-------|---------------|--------|-------|---------------|---------------------------------|
|                                                                          |                             |     |               | <10                                                         |       |               | 10-19  |       |               | ≥20    |       |               |                                 |
|                                                                          | Deaths                      | RR  | SE(log risk)* | Deaths                                                      | RR    | SE(log risk)* | Deaths | RR    | SE(log risk)* | Deaths | RR    | SE(log risk)* |                                 |
| All causes                                                               | 25,030                      | 1.0 | 0.007         | 4,513                                                       | 1.98  | 0.015         | 12,282 | 2.77  | 0.009         | 7,806  | 3.74  | 0.012         | <0.0001                         |
| Chronic lung disease (J40-44)                                            | 121                         | 1.0 | 0.093         | 288                                                         | 22.71 | 0.059         | 830    | 32.87 | 0.035         | 671    | 60.49 | 0.041         | <0.0001                         |
| Cancer of lung (C34)                                                     | 698                         | 1.0 | 0.039         | 720                                                         | 10.83 | 0.037         | 2,820  | 22.03 | 0.019         | 2,093  | 36.00 | 0.023         | <0.0001                         |
| Aortic aneurysm (I71)                                                    | 164                         | 1.0 | 0.085         | 56                                                          | 3.87  | 0.133         | 186    | 7.18  | 0.074         | 88     | 8.09  | 0.110         | <0.0001                         |
| Intestinal ischaemia (K55)                                               | 91                          | 1.0 | 0.114         | 33                                                          | 3.93  | 0.174         | 87     | 5.32  | 0.108         | 63     | 8.42  | 0.131         | <0.0001                         |
| Cancer of mouth, pharynx, larynx, nasal cavity or sinuses (C00-14,30-32) | 91                          | 1.0 | 0.114         | 29                                                          | 2.85  | 0.185         | 101    | 4.91  | 0.100         | 74     | 7.20  | 0.122         | <0.0001                         |
| Coronary heart disease (I21-25)                                          | 1,732                       | 1.0 | 0.026         | 487                                                         | 3.19  | 0.046         | 1,389  | 4.55  | 0.027         | 850    | 5.92  | 0.035         | <0.0001                         |
| Cirrhosis or alcoholic liver (K70,74)                                    | 256                         | 1.0 | 0.069         | 86                                                          | 2.73  | 0.108         | 226    | 3.34  | 0.067         | 166    | 3.97  | 0.081         | 0.0004                          |
| Cancer of bladder (C67)                                                  | 156                         | 1.0 | 0.091         | 38                                                          | 2.68  | 0.162         | 100    | 3.66  | 0.100         | 40     | 3.24  | 0.161         | 0.6                             |
| Cancer of oesophagus (C15)                                               | 353                         | 1.0 | 0.057         | 81                                                          | 2.17  | 0.111         | 216    | 2.99  | 0.068         | 153    | 4.62  | 0.084         | <0.0001                         |
| Pneumonia (J12-18)                                                       | 408                         | 1.0 | 0.056         | 81                                                          | 2.06  | 0.111         | 245    | 3.06  | 0.064         | 168    | 4.42  | 0.080         | <0.0001                         |
| Cerebrovascular disease (I60-69)                                         | 1,458                       | 1.0 | 0.030         | 301                                                         | 2.29  | 0.058         | 796    | 3.20  | 0.036         | 431    | 3.81  | 0.050         | <0.0001                         |
| Cancer of pancreas (C25)                                                 | 1,082                       | 1.0 | 0.035         | 179                                                         | 1.89  | 0.075         | 415    | 2.37  | 0.049         | 215    | 2.66  | 0.070         | 0.003                           |
| Cancer of kidney (C64)                                                   | 360                         | 1.0 | 0.061         | 43                                                          | 1.42  | 0.152         | 132    | 2.28  | 0.087         | 71     | 2.56  | 0.121         | 0.004                           |
| Cancer of stomach (C16)                                                  | 329                         | 1.0 | 0.064         | 54                                                          | 1.75  | 0.136         | 129    | 2.04  | 0.088         | 64     | 2.20  | 0.127         | 0.2                             |
| Diabetes (E10-14)                                                        | 192                         | 1.0 | 0.082         | 21                                                          | 1.35  | 0.218         | 63     | 1.86  | 0.126         | 38     | 2.17  | 0.165         | 0.08                            |
| External causes (V01-Y98)                                                | 677                         | 1.0 | 0.045         | 101                                                         | 1.47  | 0.099         | 224    | 1.65  | 0.067         | 162    | 2.34  | 0.081         | 0.0002                          |
| Pulmonary fibrosis (J84.1)                                               | 162                         | 1.0 | 0.092         | 23                                                          | 1.56  | 0.208         | 46     | 1.58  | 0.148         | 19     | 1.37  | 0.233         | 0.6                             |
| Cancer of liver (C22)                                                    | 319                         | 1.0 | 0.066         | 41                                                          | 1.42  | 0.156         | 88     | 1.56  | 0.107         | 42     | 1.54  | 0.157         | 0.7                             |
| Venous thromboembolism (I26,80-82)                                       | 669                         | 1.0 | 0.045         | 76                                                          | 1.34  | 0.115         | 154    | 1.39  | 0.081         | 97     | 1.77  | 0.103         | 0.03                            |
| Leukaemia (C91-95)                                                       | 416                         | 1.0 | 0.058         | 50                                                          | 1.42  | 0.141         | 87     | 1.32  | 0.107         | 39     | 1.28  | 0.162         | 0.7                             |
| Motor neurone disease (G12.2)                                            | 374                         | 1.0 | 0.062         | 38                                                          | 1.19  | 0.162         | 71     | 1.19  | 0.119         | 45     | 1.67  | 0.152         | 0.1                             |
| Cancer of large intestine (C18-20)                                       | 1,671                       | 1.0 | 0.029         | 175                                                         | 1.20  | 0.076         | 333    | 1.22  | 0.055         | 177    | 1.39  | 0.076         | 0.2                             |
| Non-Hodgkin lymphoma (C82-85)                                            | 561                         | 1.0 | 0.050         | 44                                                          | 0.90  | 0.151         | 118    | 1.27  | 0.092         | 52     | 1.23  | 0.140         | 0.3                             |
| Cancer of breast (C50)                                                   | 2,295                       | 1.0 | 0.025         | 204                                                         | 0.97  | 0.070         | 462    | 1.15  | 0.047         | 246    | 1.25  | 0.065         | 0.006                           |
| Brain tumours (C71,D43)                                                  | 787                         | 1.0 | 0.043         | 61                                                          | 0.89  | 0.128         | 153    | 1.17  | 0.081         | 70     | 1.13  | 0.121         | 0.3                             |
| Cancer of ovary (C56)                                                    | 1,953                       | 1.0 | 0.027         | 169                                                         | 0.99  | 0.077         | 328    | 1.04  | 0.055         | 166    | 1.12  | 0.079         | 0.2                             |
| Multiple myeloma (C90)                                                   | 385                         | 1.0 | 0.061         | 30                                                          | 0.95  | 0.182         | 58     | 0.99  | 0.131         | 32     | 1.17  | 0.179         | 0.5                             |
| Alzheimer's and dementia (F03,G30)                                       | 400                         | 1.0 | 0.062         | 53                                                          | 1.43  | 0.137         | 62     | 0.94  | 0.127         | 14     | 0.54  | 0.269         | 0.001                           |
| Melanoma (C43)                                                           | 220                         | 1.0 | 0.080         | 22                                                          | 1.11  | 0.213         | 39     | 1.07  | 0.160         | 12     | 0.69  | 0.291         | 0.3                             |
| Cancer of endometrium (C54)                                              | 393                         | 1.0 | 0.060         | 20                                                          | 0.67  | 0.224         | 42     | 0.75  | 0.154         | 22     | 0.82  | 0.215         | 0.6                             |



**Web table 5: All-cause mortality and the four main causes of death among current smokers: Death rates per 100,000 women and 12-year relative risk (RR) for current smokers versus never-smokers by attained age.**

|                                | Never-smoker at recruitment |                       | Current smoker at recruitment |                       | Rate difference (/100,000) | RR (95% CI) current versus never smoker |
|--------------------------------|-----------------------------|-----------------------|-------------------------------|-----------------------|----------------------------|-----------------------------------------|
|                                | Number of deaths            | Death rate (/100,000) | Number of deaths              | Death rate (/100,000) |                            |                                         |
| <b>All causes</b>              |                             |                       |                               |                       |                            |                                         |
| Age <60                        | 3,777                       | 71.0                  | 4,779                         | 221.1                 | 150.1                      | 2.60 (2.49-2.72)                        |
| Age 60-69                      | 13,740                      | 187.1                 | 14,544                        | 549.0                 | 361.9                      | 2.81 (2.74-2.88)                        |
| Age 70+                        | 7,513                       | 257.5                 | 5,278                         | 683.1                 | 425.6                      | 2.83 (2.73-2.94)                        |
|                                |                             |                       |                               |                       |                            |                                         |
| <b>Cancer of the lung</b>      |                             |                       |                               |                       |                            |                                         |
| Age <60                        | 103                         | 1.9                   | 1,015                         | 47.0                  | 45.1                       | 19.9 (16.1-24.4)                        |
| Age 60-69                      | 412                         | 5.6                   | 3,450                         | 130.2                 | 124.6                      | 20.8 (18.7-23.1)                        |
| Age 70+                        | 183                         | 6.3                   | 1,168                         | 151.2                 | 144.9                      | 24.4 (20.8-28.7)                        |
|                                |                             |                       |                               |                       |                            |                                         |
| <b>Chronic lung disease</b>    |                             |                       |                               |                       |                            |                                         |
| Age <60                        | 7                           | 0.1                   | 163                           | 7.5                   | 7.4                        | 38.3 (17.8-82.4)                        |
| Age 60-69                      | 57                          | 0.8                   | 1,049                         | 39.6                  | 38.8                       | 36.9 (28.1-48.3)                        |
| Age 70+                        | 57                          | 2.0                   | 577                           | 74.7                  | 72.7                       | 34.7 (26.2-45.8)                        |
|                                |                             |                       |                               |                       |                            |                                         |
| <b>Coronary heart disease</b>  |                             |                       |                               |                       |                            |                                         |
| Age <60                        | 180                         | 3.4                   | 579                           | 26.8                  | 23.4                       | 6.66 (5.60-7.93)                        |
| Age 60-69                      | 906                         | 12.3                  | 1,615                         | 61.0                  | 48.7                       | 4.79 (4.40-5.22)                        |
| Age 70+                        | 646                         | 22.1                  | 532                           | 68.9                  | 46.8                       | 3.30 (2.92-3.73)                        |
|                                |                             |                       |                               |                       |                            |                                         |
| <b>Cerebrovascular disease</b> |                             |                       |                               |                       |                            |                                         |
| Age <60                        | 192                         | 3.6                   | 355                           | 16.4                  | 12.8                       | 3.90 (3.24-4.70)                        |
| Age 60-69                      | 671                         | 9.1                   | 805                           | 30.4                  | 21.3                       | 3.28 (2.94-3.65)                        |
| Age 70+                        | 595                         | 20.4                  | 368                           | 50.0                  | 29.6                       | 2.43 (2.11-2.79)                        |

**Web figure 3. Chronic lung disease, cancer of the lung, coronary heart disease, and cerebrovascular disease: 9-year relative risk for ex-smokers by age at stopping (as reported at the 3-year postal resurvey) versus never-smokers**  
 The area of each square is inversely proportional to the variance of the log relative risk (vs never-smokers), which also determines the CI

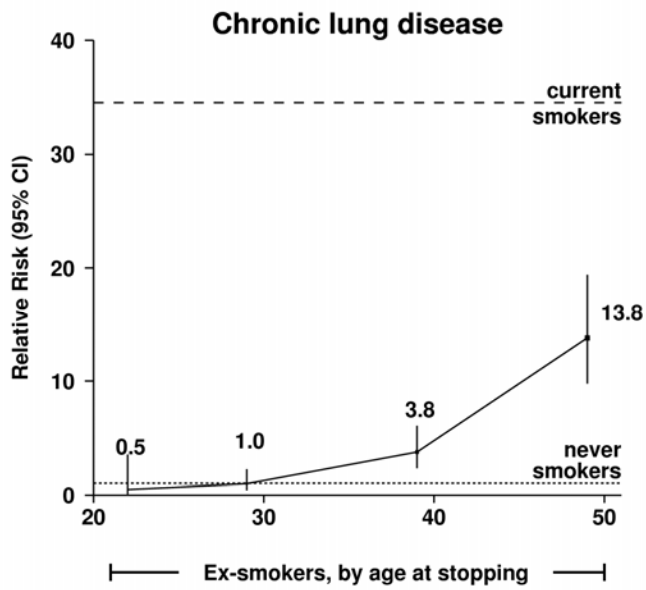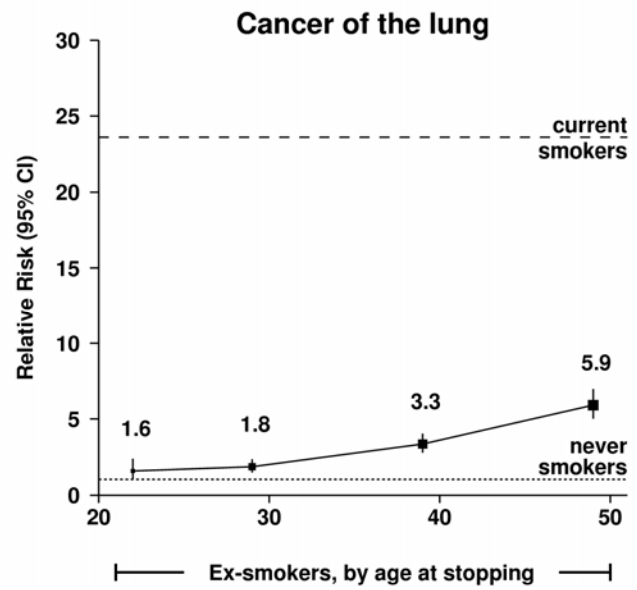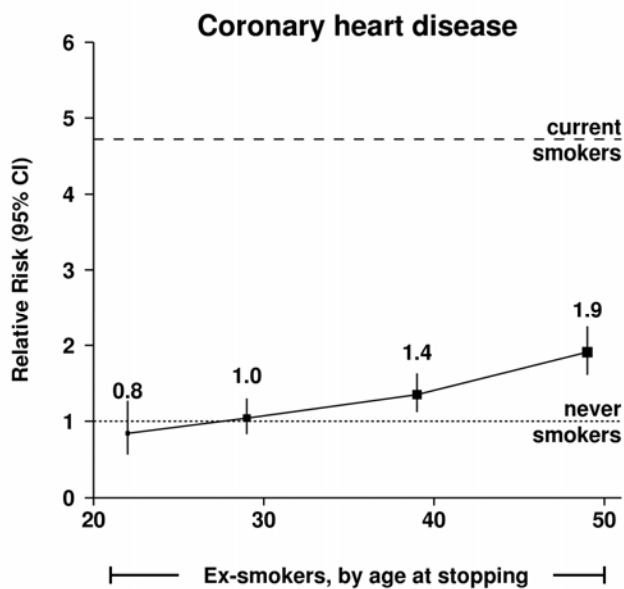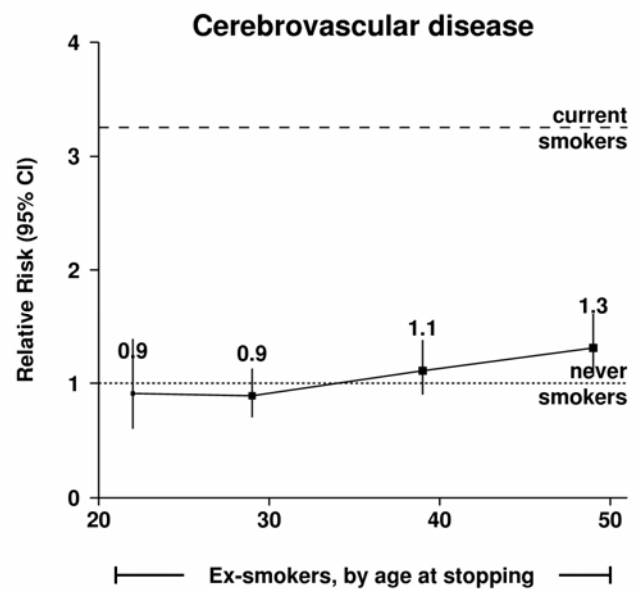

## References

1. **Prospective Studies Collaboration. Body-mass index and cause-specific mortality in 900 000 adults: collaborative analyses of 57 prospective studies. *The Lancet*. 2009; 373(9669): 1083-96.**
